# Supplementary material for: Insight into the Impact of Oxidative Stress on the Barrier Properties of Lipid Bilayer Models
Source: MDPI journal article supplement (doi:10.3390/ijms23115932), 2022-05-25
Supplement: s1 [file s1]

## The impact of oxidative stress on the barrier properties of lipid bilayer models

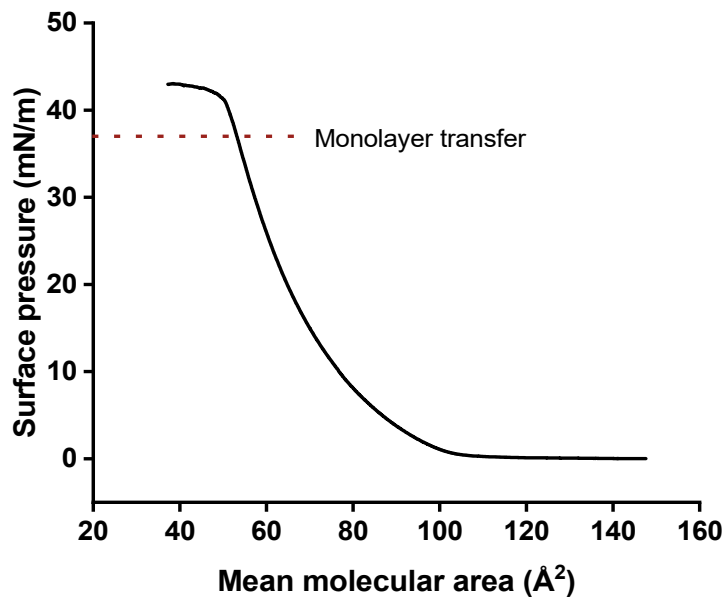

Figure S1.  $\pi$ -A isotherm of DOPE + DOPS + 10% cholesterol obtained on a pure water surface in a nitrogen atmosphere at 22 °C.

Table S1. Target Pressures for the transfer of monolayers with different lipid compositions with Langmuir-Blodgett and Langmuir-Schaefer techniques

| Lipid composition                       | Target pressure (mN/m) |
|-----------------------------------------|------------------------|
| DOPE + DOPS + 10% cholesterol           | 37                     |
| POPC + SM(d18:1/18:0) + 10% cholesterol | 37                     |
| DOPE + DOPS                             | 38                     |
| POPC + SM(d18:1/18:0)                   | 36                     |
| POPC                                    | 35                     |
| SM(d18:1/18:0)                          | 41                     |
| DOPE                                    | 37                     |
| DOPS                                    | 38                     |

Table S2. Retention time (RT) analysis of POPC

| lipid peroxidation products           | Formula neutral                                    | Obs. Mass [M+CH <sub>3</sub> COO] <sup>-</sup> | RT [min]  |
|---------------------------------------|----------------------------------------------------|------------------------------------------------|-----------|
| POPC 16:0/18:1;OH,OOH or 16:0/18:0;3O | C <sub>42</sub> H <sub>82</sub> NO <sub>11</sub> P | 866.5768                                       | 6.77      |
| POPC 16:0/18:0;oxo or Ep              | C <sub>42</sub> H <sub>82</sub> NO <sub>9</sub> P  | 834.5864                                       | 6.90/7.02 |
| POPC 16:0/8:0;oxo                     | C <sub>32</sub> H <sub>62</sub> NO <sub>9</sub> P  | 694.4304                                       | 7.33      |
| POPC 16:0/9:0;oxo                     | C <sub>33</sub> H <sub>64</sub> NO <sub>9</sub> P  | 708.4464                                       | 7.26      |
| POPC 16:0/9:0;COOH                    | C <sub>33</sub> H <sub>64</sub> NO <sub>10</sub> P | 664.4199 [-H]                                  | 8.36/8.50 |

Table S3. Retention time (RT) analysis of DOPE

| lipid peroxidation products | Formula neutral                                    | Obs. Mass [M-H] <sup>-</sup> | RT [min]  |
|-----------------------------|----------------------------------------------------|------------------------------|-----------|
| DOPE 18:1/9:0;oxo           | C <sub>32</sub> H <sub>60</sub> NO <sub>9</sub> P  | 632.3936                     | 6.70      |
| DOPE 18:1/9:0;COOH          | C <sub>32</sub> H <sub>60</sub> NO <sub>10</sub> P | 634.3727                     | 7.96      |
| DOPE 18:1/18:1;oxo          | C <sub>41</sub> H <sub>76</sub> NO <sub>9</sub> P  | 756.5177                     | 6.41      |
| DOPE 18:1_0:0               | C <sub>23</sub> H <sub>46</sub> NO <sub>7</sub> P  | 478.2939                     | 7.57/7.72 |
| DOPE 18:1/18:0;oxo or Ep    | C <sub>41</sub> H <sub>78</sub> NO <sub>9</sub> P  | 758.5346                     | 6.41/6.53 |
| DOPE 18:1/18:1;oxo(2)       | C <sub>41</sub> H <sub>74</sub> NO <sub>10</sub> P | 770.4976                     | 6.51      |

Table S4. Retention time (RT) analysis of DOPS

| lipid peroxidation products                               | Formula neutral                                    | Obs. Mass [M-H] <sup>-</sup> | RT [min] |
|-----------------------------------------------------------|----------------------------------------------------|------------------------------|----------|
| DOPS 18:1/18:1;GPAA                                       | C <sub>41</sub> H <sub>75</sub> O <sub>10</sub> P  | 757.4835                     | 6.39     |
| DOPS 18:1/9:0;oxo                                         | C <sub>33</sub> H <sub>60</sub> NO <sub>11</sub> P | 676.3836                     | 7.12     |
| DOPS 18:1/18:1;(OOH) <sub>2</sub> or (OH) <sub>4</sub> or | C <sub>42</sub> H <sub>78</sub> NO <sub>14</sub> P | 850.5082                     | 6.94     |
| DOPS 18:1/18:0;(OH) <sub>2</sub> ;(oxo) <sub>2</sub>      |                                                    |                              |          |
| DOPS 18:1/18:1;O <sub>3</sub>                             | C <sub>42</sub> H <sub>78</sub> NO <sub>13</sub> P | 834.5135                     | 6.98     |
| DOPS 18:1/18:1;OOH, oxo                                   | C <sub>42</sub> H <sub>76</sub> NO <sub>13</sub> P | 832.4982                     | 6.92     |
| DOPS 18:1/18:1;OH, oxo                                    | C <sub>42</sub> H <sub>76</sub> NO <sub>12</sub> P | 816.5048                     | 7.00     |
| DOPS 18:1/18:0;oxo or Ep                                  | C <sub>42</sub> H <sub>78</sub> NO <sub>11</sub> P | 802.5229                     | 6.84     |
| DOPS 18:1/18:1;oxo                                        | C <sub>42</sub> H <sub>76</sub> NO <sub>11</sub> P | 800.5088                     | 6.71     |

Table S5. Retention time (RT) analysis of SM (d18:1/18:0)

| lipid peroxidation products | Formula neutral                                                 | Obs. Mass [M+CH <sub>3</sub> COO] <sup>-</sup> | RT [min] |
|-----------------------------|-----------------------------------------------------------------|------------------------------------------------|----------|
| SM 18:0/18:1;OH             | C <sub>41</sub> H <sub>83</sub> N <sub>2</sub> O <sub>7</sub> P | 805.6076                                       | 7.74     |
| SM 18:0/18:1;oxo            | C <sub>41</sub> H <sub>81</sub> N <sub>2</sub> O <sub>7</sub> P | 803.592                                        | 7.57     |

- POPC 16:0/9:0;oxo

**PC 16:0/9:0;oxo @ 7.26 min, hcd 21.67**

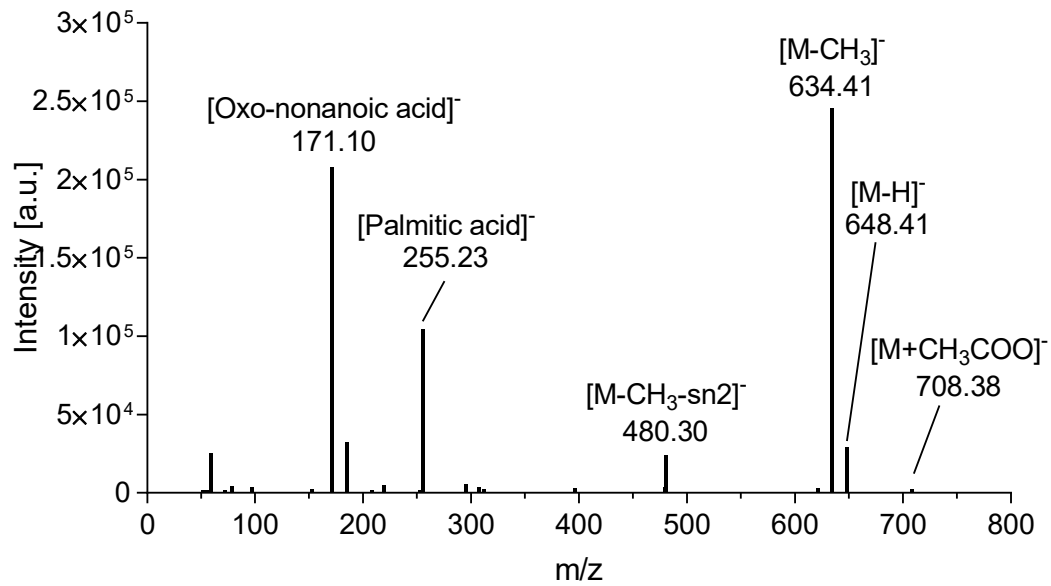

- POPC 16:0/9:0;COOH

**PC 16:0/9:0;COOH @ 8.36/8.50, hcd 21.67**

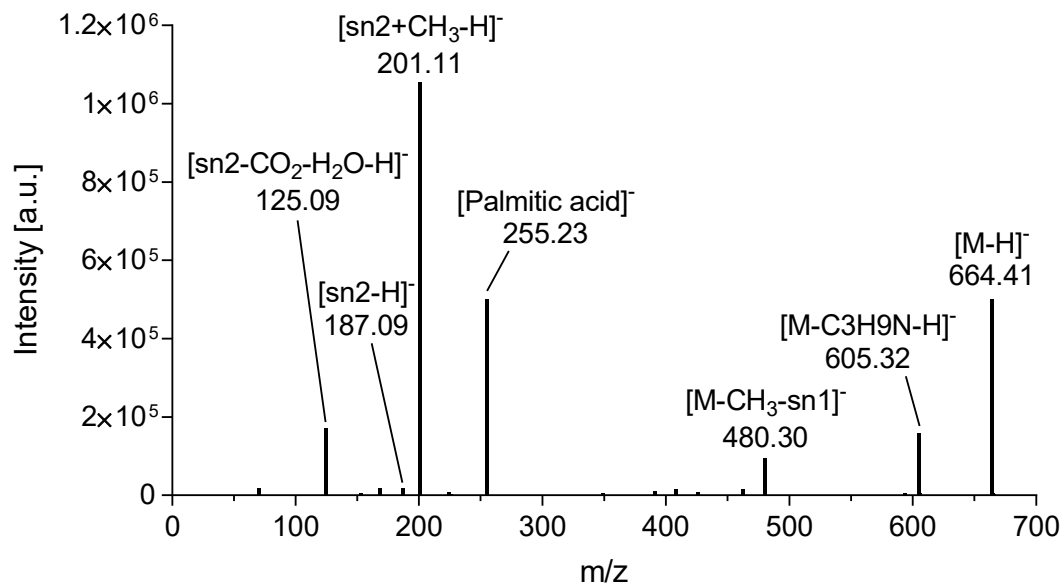

- DOPE 18:1/9:0;oxo

**PE 18:1/9:0;oxo @ 6.70 min, hcd 21.67**

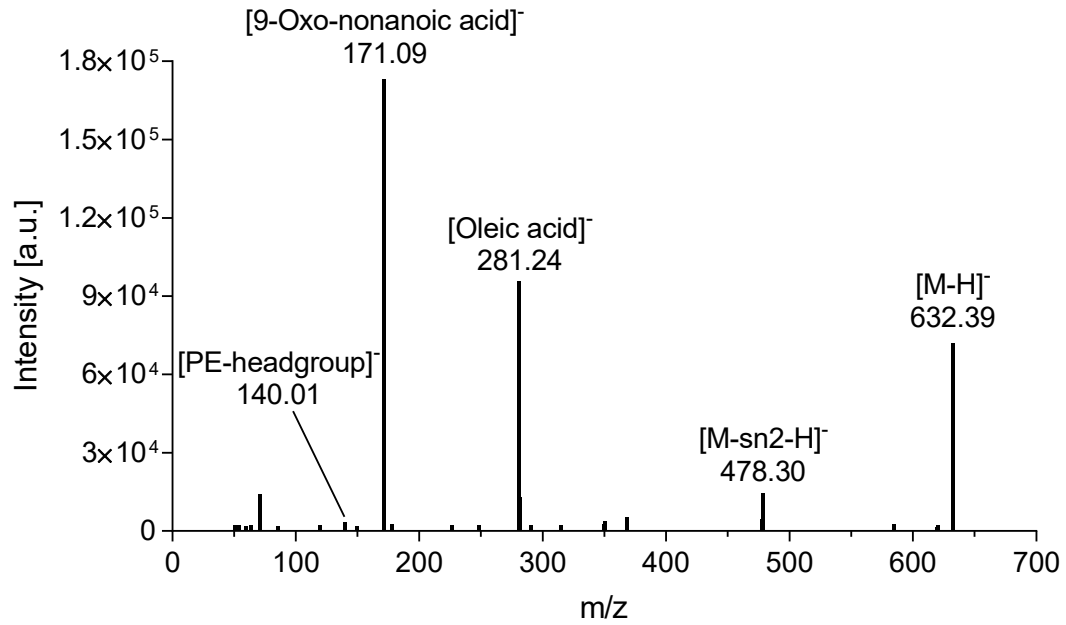

- DOPE 18:1/18:1;oxo

**PE 18:1/18:1;oxo @ 6.41 min, hcd 21.67**

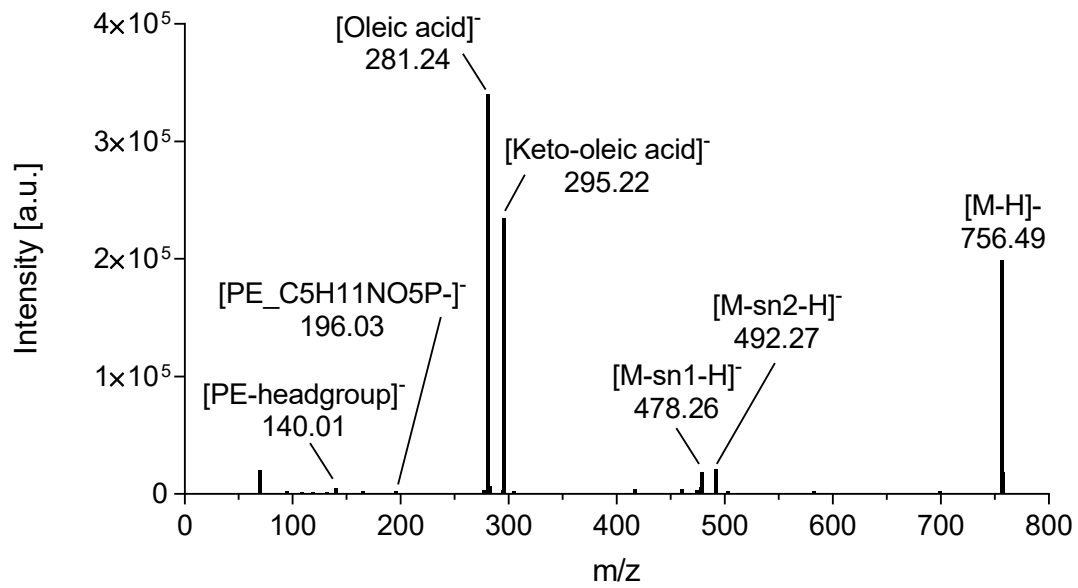

- DOPS 18:1/18:1;GPAA

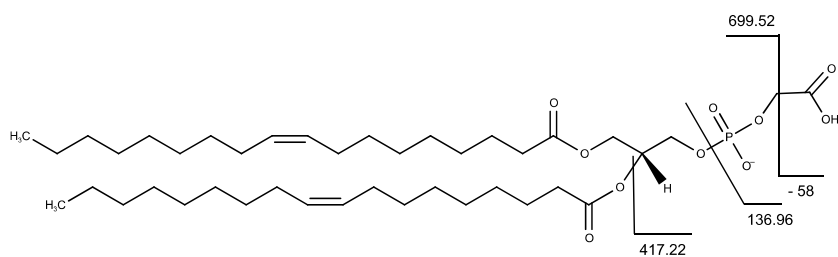

**PS 18:1/18:1;GPAA @ 6.39 min, hcd 21.67**

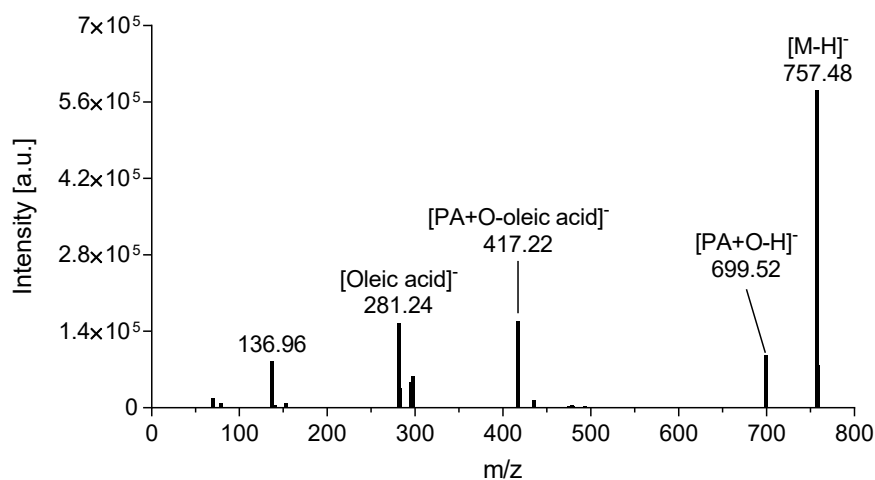

- DOPS 18:1/18:0;oxo or Ep

**PS 18:1/18:0;oxo or Ep @ 6.84 min; hcd 21.67**

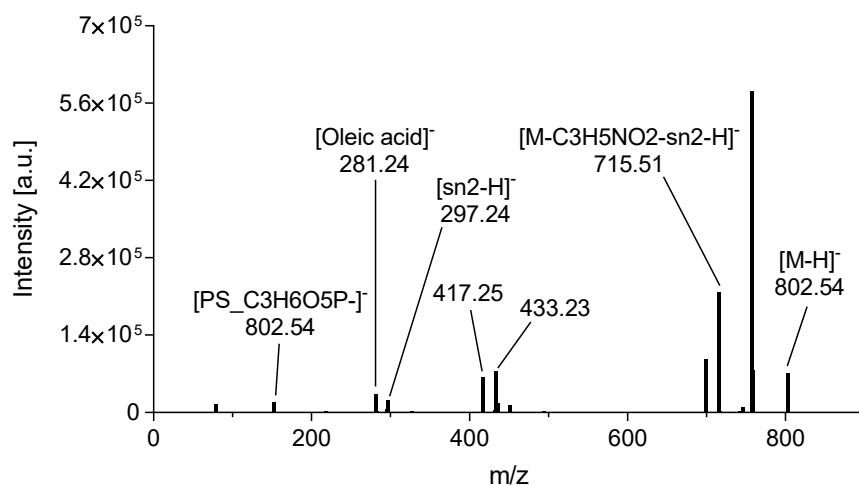

Figure S2. MS<sup>2</sup> fragmentation pattern of selected LPPs.
